# Supplementary material for: Clinical Pharmacology of Asciminib: A Review
Source: PubMed Central journal article supplement — Clin Pharmacokinet. 2024 Oct 29;63(11):1513–28. doi: 10.1007/s40262-024-01428-6 (PMC11573869; doi:10.1007/s40262-024-01428-6), 2024-10-29
Supplement: 40262_2024_1428_MOESM1_ESM.pdf [file 40262_2024_1428_MOESM1_ESM.pdf]

## **Supplementary Information (SI)**

### **Clinical Pharmacology of Asciminib: A Review**

#### ***Clinical Pharmacokinetics***

Matthias Hoch<sup>1</sup>, Felix Huth<sup>1</sup>, Paul W. Manley<sup>1</sup>, Ioannis Loisos Konstantinidis<sup>1</sup>, Francois Pierre Combes<sup>2</sup>, Ying Fei Li<sup>2</sup>, Yunlin Fu<sup>2</sup>, Sherwin K. B. Sy<sup>2</sup>, Vanessa Obourn<sup>3</sup>, Abhijit Chakraborty<sup>2</sup>, Florence Hourcade-Potelleret<sup>1</sup>

<sup>1</sup>Novartis Biomedical Research, Basel, Switzerland

<sup>2</sup>Novartis Pharmaceuticals, East Hanover, NJ, USA

<sup>3</sup>Novartis Development, Cambridge, MA, USA

#### **Corresponding author:**

Matthias Hoch, PhD

Novartis Biomedical Research, Fabrikstrasse 2, CH-4056 Basel, Switzerland

Email: [Matthias.hoch@novartis.com](mailto:Matthias.hoch@novartis.com)

**Supplementary Table 1:** Population pharmacokinetic parameters of asciminib and covariate relationships.

| Definition of parameters                      | Parameter (unit)                                                                                                                                                                                                                   | Variability <sup>†</sup><br>SD |
|-----------------------------------------------|------------------------------------------------------------------------------------------------------------------------------------------------------------------------------------------------------------------------------------|--------------------------------|
| Lag time                                      | $T_{lag}(h) = 0.38$                                                                                                                                                                                                                | -                              |
| Absorption rate constant                      | $k_a(1/h) = 1.96 \cdot \exp[-1.02, \text{if formulation is capsule}]$                                                                                                                                                              | 0.79                           |
| Apparent Clearance (CL/F)                     | $CL (L/h) = 6.31 \cdot \exp \left[ -0.34 \cdot \log \left( \frac{NTDD}{80 \text{ mg}} \right) + 0.31 \cdot \log \left( \frac{aGFR}{90.4 \text{ mL/min}} \right) + 0.75 \cdot \log \left( \frac{BW}{70 \text{ kg}} \right) \right]$ | 0.42                           |
| Apparent Central compartment volume (V/F)     | $V_c(L) = 46.5 \cdot \exp \left[ 1 \cdot \log \left( \frac{BW}{70 \text{ kg}} \right) \right]$                                                                                                                                     | 0.42                           |
| Apparent Intercompartment clearance (Q/F)     | $Q (L/h) = 6.51$                                                                                                                                                                                                                   | -                              |
| Apparent Peripheral compartment volume (Vp/F) | $V_p(L) = 64.5$                                                                                                                                                                                                                    | 1.57                           |
| Relative bioavailability                      | $F = 1$                                                                                                                                                                                                                            | -                              |
| Correlations                                  | $Corr(V_c, CL)$                                                                                                                                                                                                                    | 0.57                           |

NTDD, nominal total daily dose in mg; aGFR, actual glomerular filtration rate in mL/min; BW, body weight in kg; SD, standard deviation

<sup>†</sup> Variability incorporated as exponential model

Reference:

Li YF, Combes FP, Hoch M, Lorenzo S, Sy SKB, Ho YY. Population Pharmacokinetics of Asciminib in Tyrosine Kinase Inhibitor-Treated Patients with Philadelphia Chromosome-Positive Chronic Myeloid Leukemia in Chronic and Acute Phases. *Clin Pharmacokinet.* 2022 Oct;61(10):1393-403.
